# Supplementary material for: One-step generation of cell-laden microgels using double emulsion drops with a sacrificial ultra-thin oil shell
Source: Royal Society of Chemistry journal article supplement (doi:10.1039/c6lc00261g), 2016-01-01
Supplement: c6lc00261g1.pdf [file c6lc00261g1.pdf]

1 Electronic Supplementary Information (ESI)

2  
3 **One-step Generation of Cell-laden Microgels Using Double Emulsion Drops with**  
4 **a Sacrificial Ultra-thin Oil Shell**

5  
6 Chang-Hyung Choi, Huanan Wang\*, Hyomin Lee, June Hwan Kim, Liyuan Zhang, Angelo Mao,  
7 David J. Mooney, and David A. Weitz\*

8  
9  
10  
11

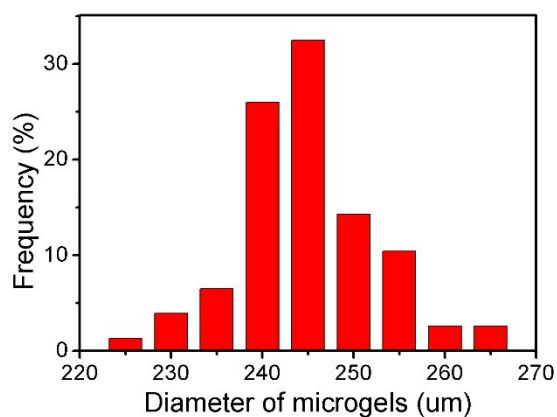

12

13 **Fig. S1.** Size distribution of cell-laden microgels.

14  
15

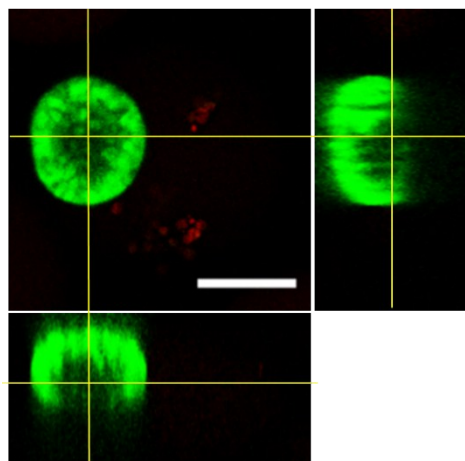

16

17 **Fig. S2.** Representative fluorescent microscopic image showing cyst formed by MDCK cells after  
18 7days of 3D culture in GelMA microgels. Orthogonal view showing three-dimensionally the cyst  
19 structure with a multi-cell thick shell and a central lumen.

20  
21

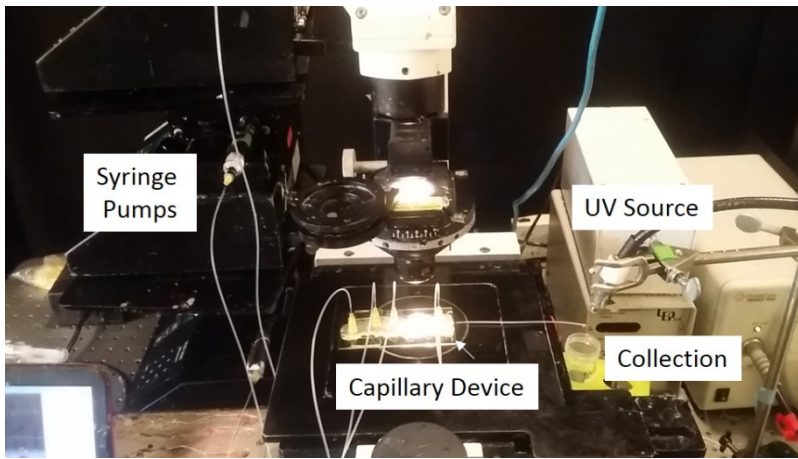

1

2 **Fig. S3.** Experimental setup of the proposed one-step microfluidic technique for continuous  
3 production of microgels.

4
